# Supplementary material
Source: PubMed Central journal article supplement (PMC8330619)
Supplement: acc-15-e01360-s002.pdf [file acc-15-e01360-s002.pdf]

# COVID+ / PUI INTUBATION

## Checklist

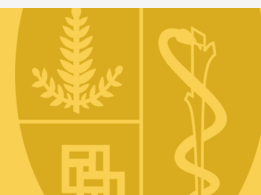

### PRE-PROCEDURE

#### 1 | People

- Notify RN
- Notify RT
- Notify PHARM
- Identify Runner
- Discuss with ICU team/Chart review

#### 2 | Equipment

- PPE (From bedside RN, ANS or Crisis RN)  
*CAPRs (shield/shroud) or N95 (with full face shield)*
- Anesthesia technicians
  - 300P: 736-1850
  - Video Laryngoscope w/ clear equipment cover
  - 500P: 724-0219
  - COVID Airway Kit
- ICU Equipment Room  
*ICU Intubation Box*
- Contamination bin or bag  
*Place needed equipment to bring in room*
- Large biohazard receptacle outside room  
*For DOFFing head PPE and final gloves*

#### 3 | Drugs

- Induction and muscle relaxant
- Rescue medications
- Sedation drips

#### 4 | Verify with RN

- Suction canister with Yankaur turned on
- IV Bag and tubing free flowing
- Post-intubation  
*Drips made, programmed, connected, ready*
- IV Manifold  
*Ports for medication push and sedation drips*

#### 5 | Verify with RT

- Viral Filter on Bag and Ventilator
- Bag ventilation  
*Ambu or Jackson-Rees at Low Vt*
- Oxygen  
*Nasal cannula, non-Rebreather*
- Ventilator  
*Appropriate LPV parameters set*
- PETCO2  
*Connected, calibrated, monitor waveform present*

#### 6 | Verify with RT and RN

- Review checklist and plan prior to procedure start

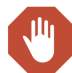

**Stop:** Go to Don checklist

### PROCEDURE/TIME OUT

- Preoxygenate 5 minutes with NC and NRB
- RSI and Video Laryngoscopy
- AVOID aerosolization, bag-vent or coughing
- Think early LMA, not bag-vent
- Inflate ETT cuff before ventilation

### POST-PROCEDURE

- Remove outer gloves
- Clean VL cord & visualizer with germicidal wipes; Place in bin; Remove clear equipment cover
-  **Stop:** Go to Doff checklist
- DOFF gown & gloves with BUDDY
- Hand Hygiene, then clean gloves
- Open door and Exit with CMAC
- DOFF head PPE and final gloves
- Wash hands, forearms, neck as needed for 2 minutes
- Call anesthesia technicians for pick up
  - 300P: 736-1850
  - 500P: 724-0219
