# Supplementary material
Source: PubMed Central journal article supplement (PMC8330619)
Supplement: acc-15-e01360-s003.pdf [file acc-15-e01360-s003.pdf]

# INTUBATION

For patients who are COVID-19 + or PUIs

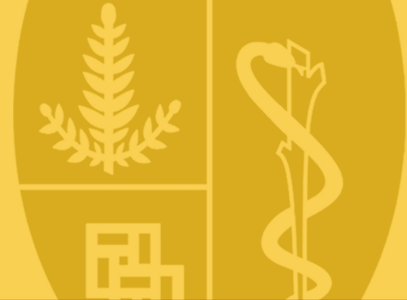

## ACCEPTABLE

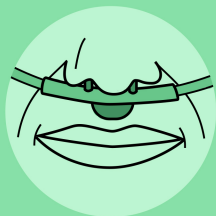

**Nasal Cannula**  
up to 6 L/min

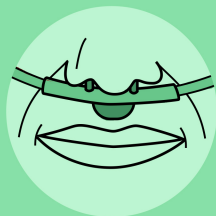

**HFNC**  
up to 30 L/min

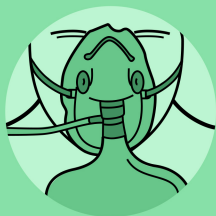

**NRB**

## RESTRICTED

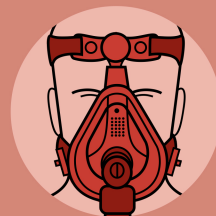

**BiPAP/CPAP\***

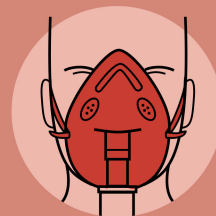

**Face Mask**

\*BiPAP/CPAP may be considered in select PUIs, ICU CONSULT REQUIRED

## INTUBATION GUIDELINES

PO<sub>2</sub> < 65 mmHg  
or SpO<sub>2</sub> < 92%  
on NRB

OR

RR > 35-40

OR

PCO<sub>2</sub> > 50  
with pH < 7.30  
in non-COPD pt

## OUTSIDE ROOM

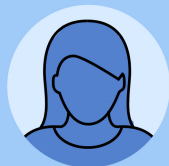

**Runner**

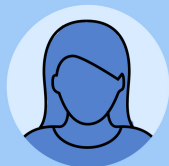

**Pharmacist**

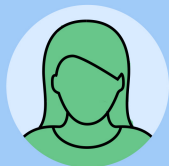

**Asst**  
in PPE

## INSIDE ROOM

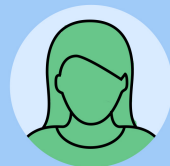

**ANES**  
in PPE

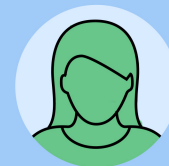

**RN**  
in PPE

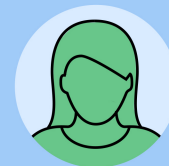

**RT**  
in PPE

## EXPERIENCED STAFF ONLY

## REQUIRED PPE *Use Donning/Doffing Buddy*

1 Gown

2 Fit-tested N95 respirator **or** CAPR

3 Face shield or goggles **if not** using CAPR

4 Gloves

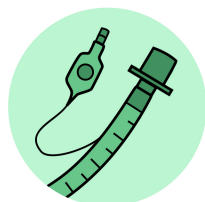

**Intubate** early if respiratory status is worsening

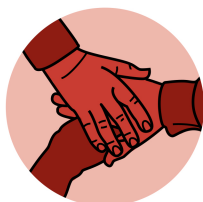

**Have a plan.** Do a pre-intubation huddle and review checklist before entering room

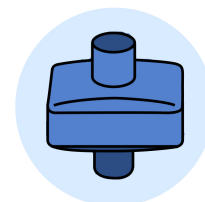

Avoid bag mask ventilation and use a **HEPA filter**
